# Supplementary material
Source: PubMed Central journal article supplement (PMC2666968)

Supplemental Table I: Plasmids used in this study.

| Plasmid                           | Reference                    |
|-----------------------------------|------------------------------|
| pSLW1                             | This study                   |
| pSLW1-B29HA                       | This study                   |
| p414TEF                           | Shaner <i>et al.</i> , 2004  |
| p414TEFSSE1                       | Shaner <i>et al.</i> , 2004  |
| p414TEFSSE1K69Q                   | Shaner <i>et al.</i> , 2004  |
| p414TEFSSE1G205D                  | Shaner <i>et al.</i> , 2004  |
| p414TEFSSE1G233D                  | Shaner <i>et al.</i> , 2004  |
| p414TEFSSE1-CTD(394-693)          | Shaner <i>et al.</i> , 2004  |
| pRS426-CFTR-HA                    | Zhang, <i>et al.</i> , 2001  |
| pSM36-pp $\alpha$ f $\Delta$ G-HA | Kim, <i>et al.</i> , 2005    |
| pRS315-CPY*-HA                    | Ng, <i>et al.</i> , 2000     |
| pSM1082-Ste6p*-HA                 | Loayza, <i>et al.</i> , 1998 |

Supplemental Table II: Antibodies used in this study.

| <b>Antibody</b>       |                   | <b>Source</b>            |
|-----------------------|-------------------|--------------------------|
| anti-ApoB (1D1)       | Mouse monoclonal  | R. Milne                 |
| anti-Albumin          | Sheep polyclonal  | Bethyl Laboratories      |
| anti-BiP              | Rabbit polyclonal | R. Schekman              |
| anti-HA               | Mouse monoclonal  | Roche                    |
| anti-Hsp82p           | Rabbit polyclonal | A. Caplan                |
| anti-L3               | Mouse monoclonal  | J. Warner                |
| anti-mammalian Hsp110 | Rabbit polyclonal | Stressgen                |
| anti-Met19p           | Rabbit polyclonal | Sigma                    |
| anti-PKC1p            | Rabbit polyclonal | Santa Cruz Biotechnology |
| anti-Sba1p            | Rabbit polyclonal | A. Caplan                |
| anti-Sec61p           | Rabbit polyclonal | R. Schekman              |
| anti-Sec63p           | Rabbit polyclonal | D. Feldheim              |
| anti-Ssa1p            | Rabbit polyclonal | J. Brodsky               |
| anti-Ssb1p            | Rabbit polyclonal | E. Craig                 |
| anti-Sse1p            | Rabbit polyclonal | J. Brodsky               |
| anti-Sti1p            | Mouse monoclonal  | D. Toft                  |
| anti-Tim23p           | Rabbit polyclonal | T. Endo                  |
| anti-Ydj1p            | Rabbit polyclonal | A. Caplan                |

**Supplemental Figure 1: ApoB29 is carbonate inextractable.** A total of 40µg of cell extract from yeast transformed with pSLW1 or pSLW1-B29 were treated with 100 mM sodium carbonate, pH 11.5. The pellet and supernatant from a 230,000g centrifugation of the cell extracts were analyzed by western blotting. The ER-luminal Hsp70 chaperone, BiP, was used as a control and was found in the supernatant, as predicted. In contrast, Sec61p was exclusively in the membrane fraction.

**Supplemental Figure 2: ApoB degradation requires both cytosolic and ER luminal factors in yeast.**

(A) A cycloheximide chase was performed in *UBC6UBC7* (●) or *ubc6Δubc7Δ* cells (○) transformed with pSLW1-B29. ApoB29 was detected using anti-HA antibodies and L3 was used as a loading control. For all cycloheximide chase analyses, each time point was normalized to the L3 loading control and the relative amount of apoB was calculated by dividing the values at each time by the value at t = 0. Data represent the means from 6 independent experiments ± SE of the means: 90 min, p < 0.005 (B) A cycloheximide chase was performed in *UBC7* (●) or *ubc7Δ* cells (○) transformed with pSLW1-B29. ApoB29 was detected using anti-HA antibodies and Sec61p was used as a loading control. Data represent the means from 7 independent experiments ± SE of the means: 60 min, p < 0.02; 90 min, p < 0.02 (C) A cycloheximide chase was performed in *DOA10HRD1* (●) or *doa10Δhrd1Δ* cells (○) transformed with pSLW1-B29. Data represent the means from 5 independent experiments ± SE of the means: 60 min, p < 0.03; 90 min, p < 0.002 (D) A cycloheximide chase was performed in *UFD1* (●) or *ufd1-1* cells (○) transformed with pSLW1-B29. Data represent the means from 4 independent experiments ± SE of the means: 90 min, p < 0.05 (E): A cycloheximide chase was performed in *KAR2* cells (●) and *kar2-1* cells (○) transformed with pSLW1-B29. Data represent the means from 5 independent experiments ± SE of the means: 60 min, p < 0.03; 90 min, p < 0.005

**Supplemental Figure 3: Sse1p differentially impacts the ERAD of diverse substrates.**

(A) A cycloheximide chase was performed in *SSE1* (●) or *sse1Δ (E0020)* cells (○) transformed with pRS426-CFTR-HA. CFTR was detected using anti-HA antibodies and Sec61p was used as a loading control. For all cycloheximide chase analysis, each time point was normalized to the Sec61p loading control and the relative amount of CFTR was calculated by dividing the values at each time by the value at t = 0. Data represent the means from 6 independent experiments ± SE of the means. All experiments were performed at 30°C. (B) A cycloheximide chase was performed in *SSE1* (●) or *sse1Δ (E0020)* cells (○) transformed with pSM1082-Ste6p\*-HA. Ste6p\* was detected using anti-HA antibodies and Sec61p was used as a loading control, as above. Data represent the means from 6 independent experiments ± SE of the means: 60 min, p < 0.006; 90 min, p < 0.007 (C) A pulse chase was performed on <sup>35</sup>S methionine labeled *SSE1* (●) or *sse1Δ (E0020)* cells (○) transformed with pSM36-ppαfΔG-HA. Pαf was immunoprecipitated from the cell extracts using anti-HA antibodies. Data represent the means from 4 independent experiments ± SE of the means. (D) A pulse chase was performed on <sup>35</sup>S methionine labeled *SSE1* (●) or *sse1Δ (E0020)* cells (○) transformed with pRS315-CPY\*-HA. CPY\* was immunoprecipitated from the cell extracts using anti-HA antibodies. Data represent the means from 4 independent experiments ± SE of the means.

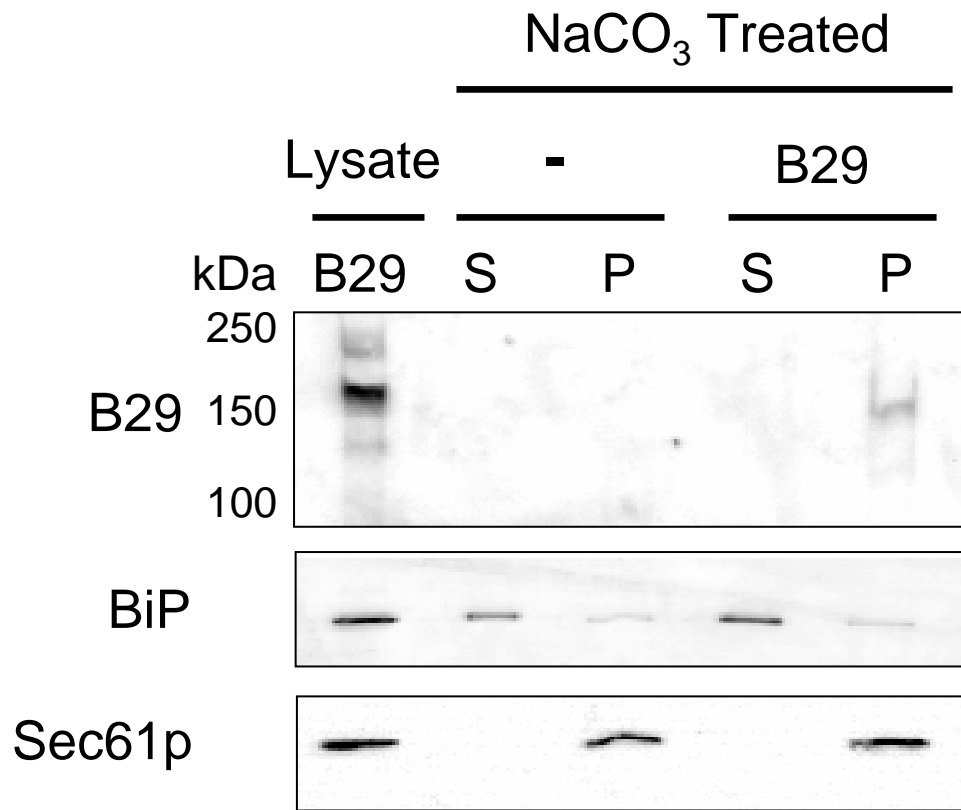

# Supplemental Figure 2

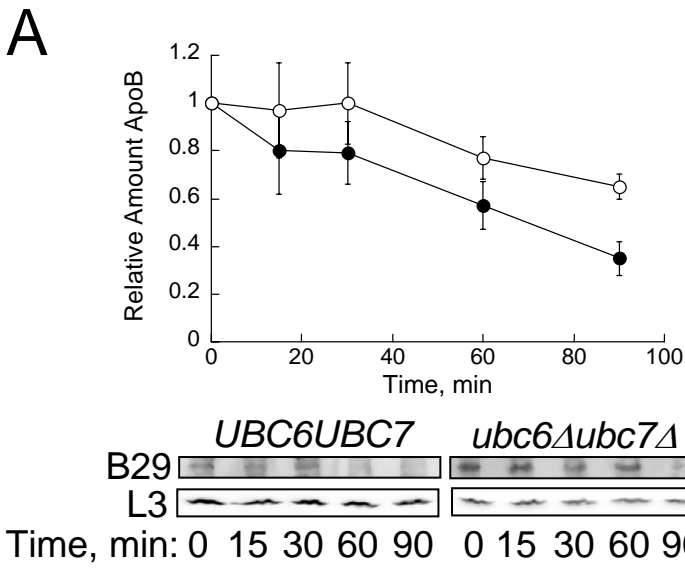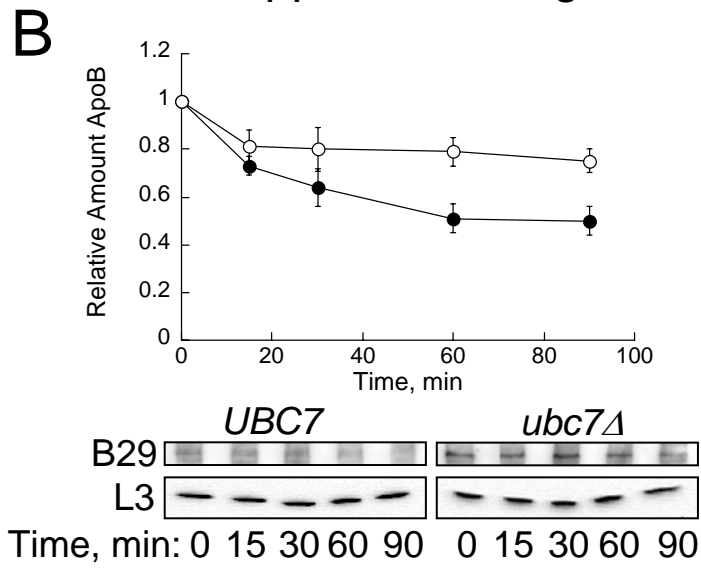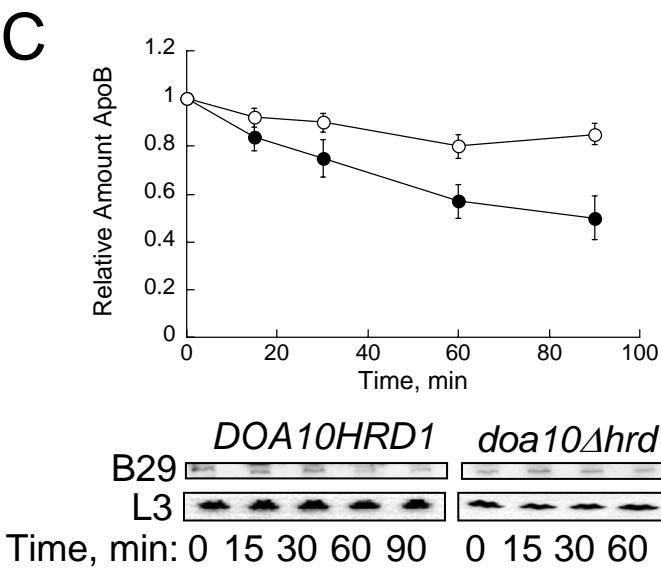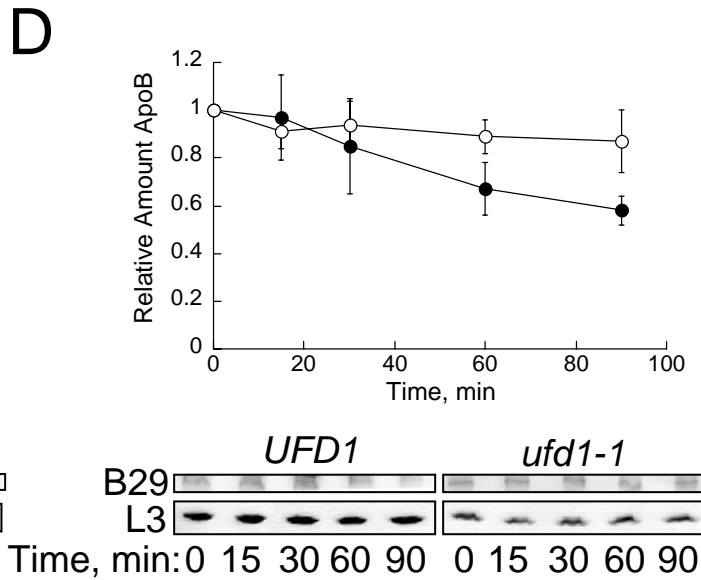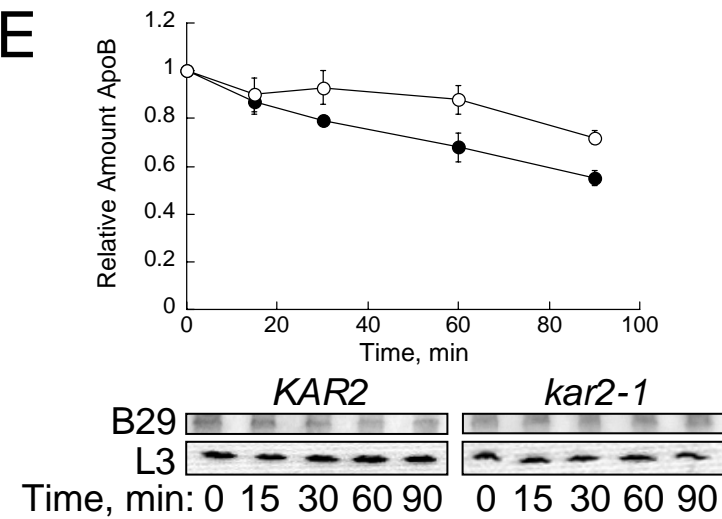

# Supplemental Figure 3

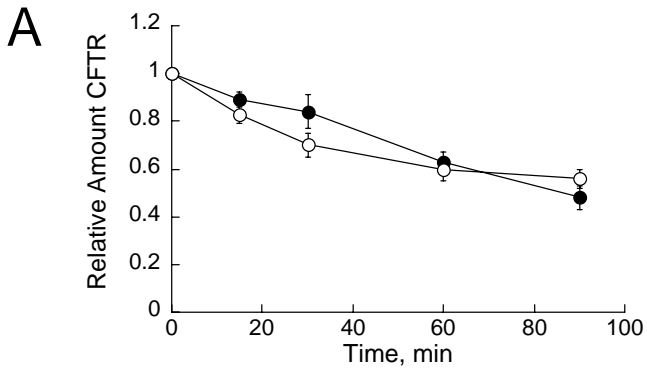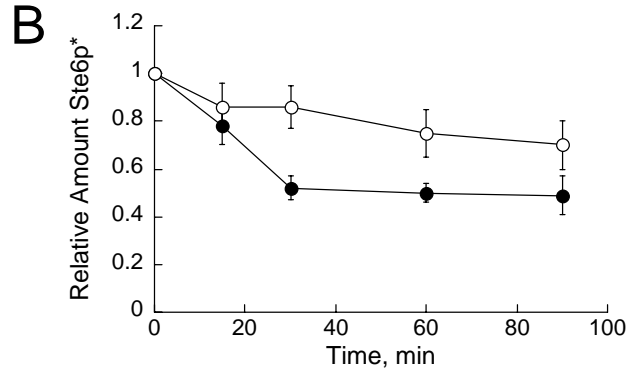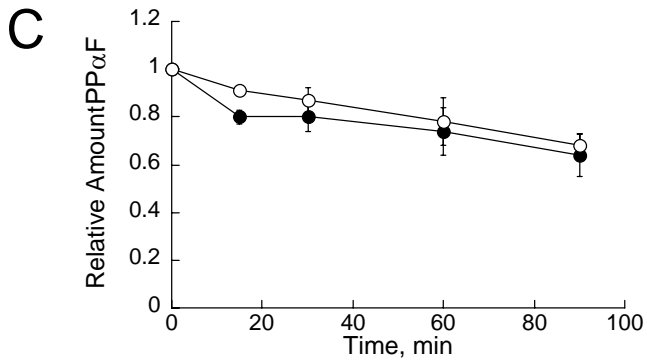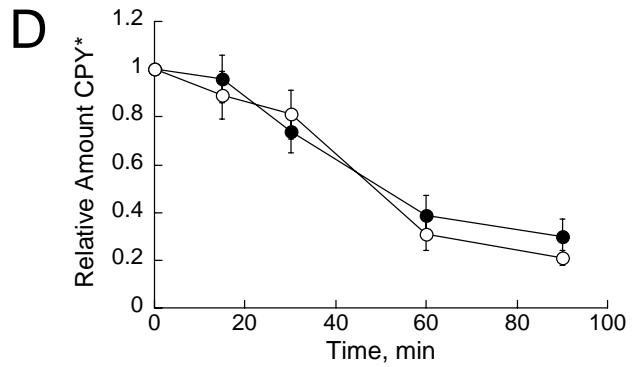

Supplement: NIHMS95375-supplement-Supplemental_D.pdf [file NIHMS95375-supplement-Supplemental_D.pdf]
